# Supplementary material
Source: PubMed Central journal article supplement (PMC1440843)
Supplement: 7601074s1.pdf [file 7601074s1.pdf]

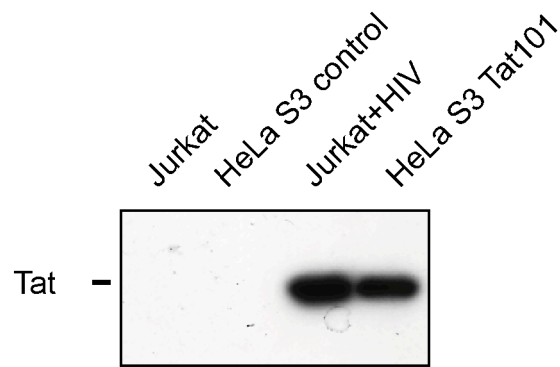

### Supplementary Material 1

The amount of Tat expressed in HeLa S3 Tat101 cells is comparable to the amount of Tat expressed in HIV-1-infected Jurkat cells.

Jurkat cells were infected with NL4-3 virus and cells were harvested at the peak of infection (21 days post-infection). Cells were lysed in RIPA buffer, and proteins in cells extracts were resolved by SDS-PAGE and transferred to PVDF membrane. Membrane were incubated over night with a mix of five monoclonal antibodies against Tat (a kind gift of K.T. Jeang).
