# Supplementary material
Source: PubMed Central journal article supplement (PMC1440843)
Supplement: 7601074s2.pdf [file 7601074s2.pdf]

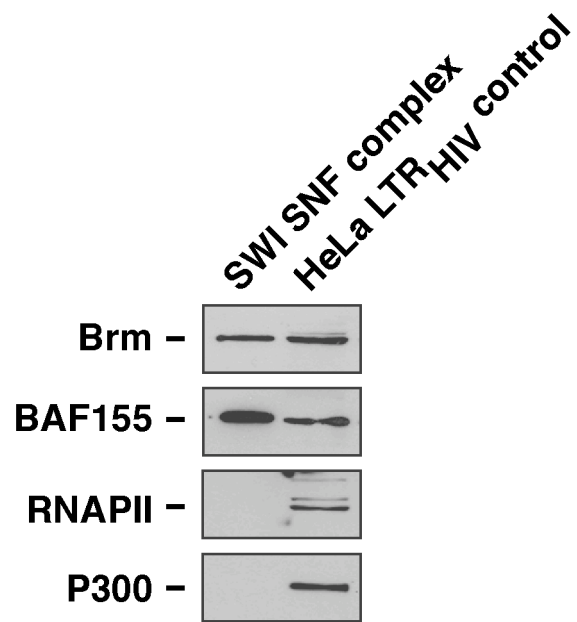

### Supplementary Material 2

The purified SWI/SNF complex contains neither P300 nor RNA polymerase II. 250ng of purified SWI/SNF complex or 75µg of total lysates from HeLa LTR<sub>HIV-1</sub> cells were subjected to Western Blot analysis using the indicated antibodies.
