# Supplementary material
Source: PubMed Central journal article supplement (PMC1440843)
Supplement: 7601074s3.pdf [file 7601074s3.pdf]

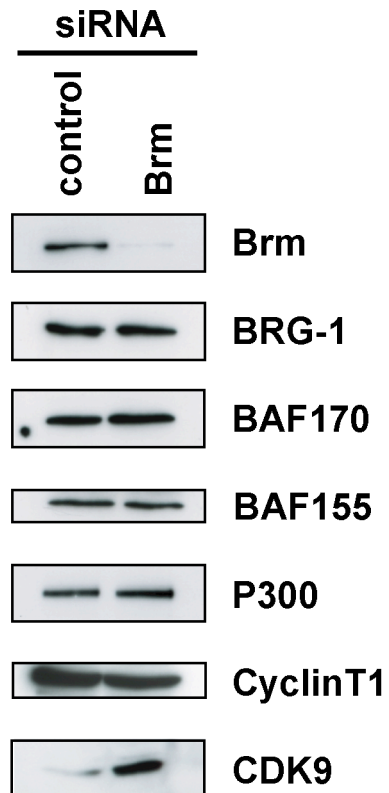

### Supplementary material 3

Expression of Tat cellular co-factors in cells depleted for endogenous Brm.

HeLa cells were transfected twice with 30nM of either anti-Brm or control siRNA. Forty-eight hours later, cells were harvested, resuspended in RIPA buffer, and protein were resolved by SDS-PAGE. Expression of endogenous Brm, BRG-1, BAF170, BAF155, P300, CyclinT1 and CDK9 were analyzed by immunoblot.
