# Supplementary material
Source: PubMed Central journal article supplement (PMC1440843)
Supplement: 7601074s4.pdf [file 7601074s4.pdf]

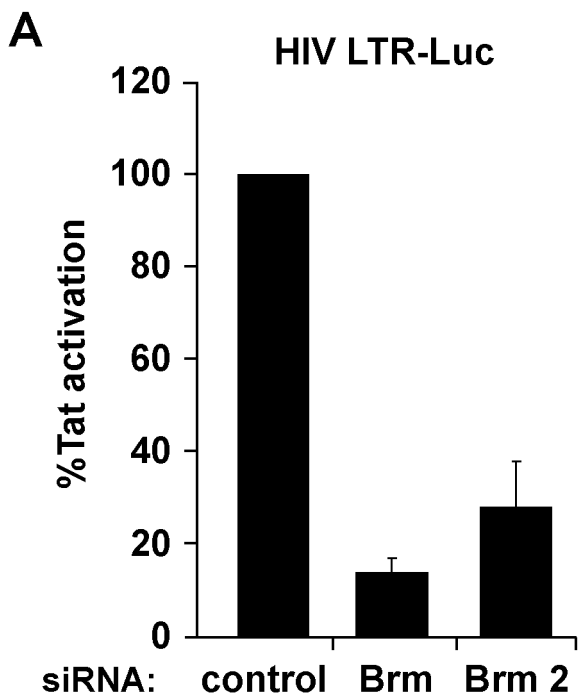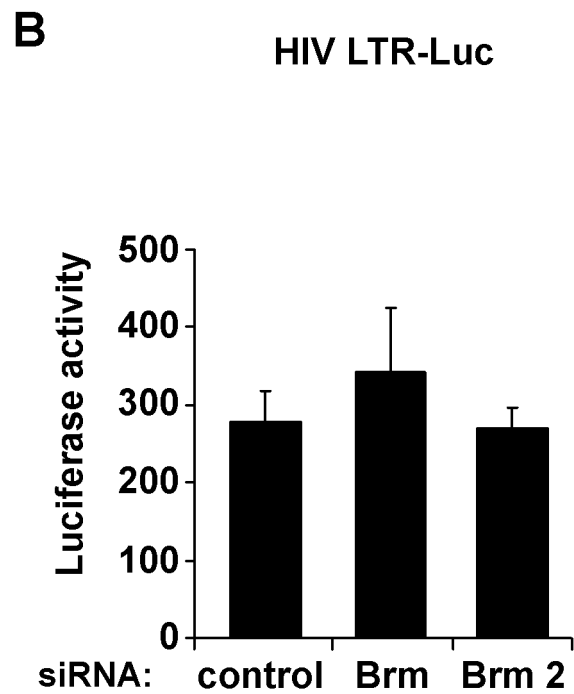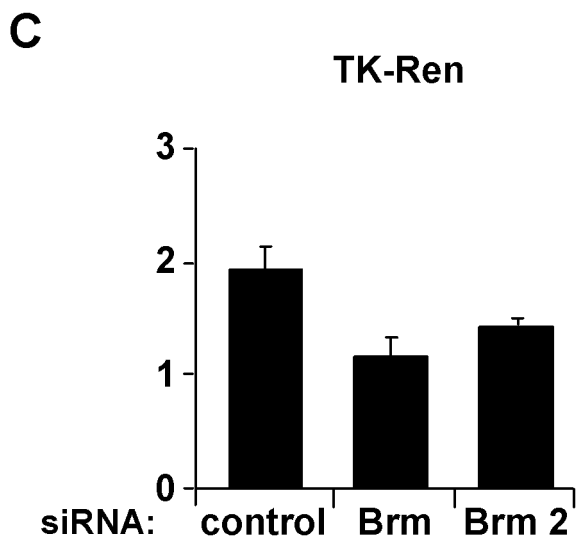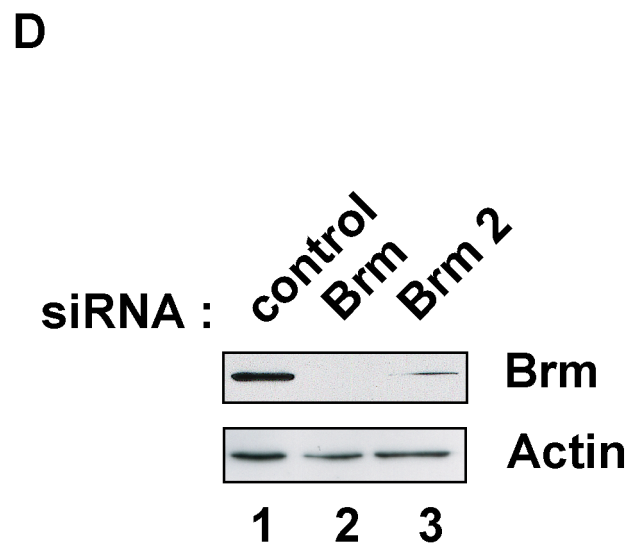

#### Supplementary Material 4

Endogenous Brm is required for Tat-mediated transactivation, but not for the basal activity, of an integrated HIV-1 promoter. HeLa Clone 6 cells were transfected twice with two different siRNA specific for Brm (Brm or Brm2 respectively) or siRNA control. (A) Tat-mediated transactivation was analysed 24h post-transfection with 30ng of Tat-Flag expression vector and was calculated relative to transfection in the absence of Tat expression plasmid. The results are represented in percentage of Tat transactivation compared to cells treated by siRNA control. (B) Measurement of the basal activity from the integrated HIV-1 LTR in absence of Tat. The mean of three independent transfection experiments is shown. (C) Luciferase activity measured from an internal control plasmid encoding Renilla under the control of the TK promoter. (D) Levels of Brm and actin proteins were determined by western blot analysis with anti-Brm and anti-actin antibodies.
